# Supplementary material for: A comparative transcriptome analysis of the novel obligate methanotroph Methylomonas sp. DH-1 reveals key differences in transcriptional responses in C1 and secondary metabolite pathways during growth on methane and methanol
Source: BMC Genomics. 2019 Feb 12;20:130. doi: 10.1186/s12864-019-5487-6 (PMC6373157; doi:10.1186/s12864-019-5487-6)
Supplement: Supplementary file 3 — Table S3. Differential expression of genes involved in RuMP cycle, EMP and EDD pathway in methane and methanol. (XLSX 14 kb) [file 12864_2019_5487_MOESM3_ESM.xlsx]

## Sheet: Table S3
Table S3. Differential expression of genes involved in RuMP cycle,EMP and EDD pathway in methane and methanol
Locus_tag	Product	Gene	FPKM on methane	FPKM on methanol	log2(fold_change)	Fold change	P-value	Significant
AYM39_RS02745	3-hexulose-6-phosphate synthase	hps1	4485.58	4479.42	-0.00198354	1.00138	0.996433	no
AYM39_RS02480	6-phospho 3-hexuloisomerase	phi	2835.18	3645.97	0.362865	1.28598	0.376952	no
AYM39_RS02475	3-hexulose-6-phosphate synthase	hps2	2432.47	3327.77	0.452137	1.36807	0.279216	no
AYM39_RS19110	glucose-6-phosphate isomerase	pgi	178.501	141.05	-0.339722	1.26551	0.287847	no
AYM39_RS14060	glucose-6-phosphate dehydrogenase	gpd1	106.831	228.637	1.09773	2.14018	0.000255359	yes
AYM39_RS17635	glucose-6-phosphate dehydrogenase	gpd2	92.4432	64.5798	-0.517483	1.43146	0.047286	no
AYM39_RS14065	6-phosphogluconolactonase	pgls	115.922	222.757	0.942313	1.92161	5.84521e-05	yes
AYM39_RS14075	phosphogluconate dehydrogenase (NADP(+)-dependent%2C decarboxylating)	pgd	102.073	103.994	0.0269024	1.01882	0.919176	no
AYM39_RS04700	ribose 5-phosphate isomerase A	rpi	179.445	99.3269	-0.853288	1.80661	0.000352954	yes
AYM39_RS09670	ribose 5-phosphate isomerase A	rpi	249.892	302.182	0.274113	1.20925	0.301384	no
AYM39_RS02485	transketolase	tkt1	1238.36	712.93	-0.796602	1.73701	0.0784094	no
AYM39_RS02750	transketolase	tkt2	855.651	510.137	-0.746136	1.67729	0.0842546	no
AYM39_RS14070	phosphogluconate dehydratase	edd	94.3805	149.232	0.660994	1.58117	0.0237448	no
AYM39_RS14080	keto-deoxy-phosphogluconate aldolase	kdpg	107.46	98.2054	-0.129921	1.09423	0.567804	no
AYM39_RS10610	fructose-bisphosphatase	fbp	73.9718	111.007	0.585604	1.50067	0.0167206	yes
AYM39_RS03385	pyrophosphate--fructose-6-phosphate 1-phosphotransferase	pfp	324.044	434.042	0.421644	1.33945	0.223404	no
AYM39_RS17510	fructose-1%2C6-bisphosphate aldolase	fbaA2	27.2813	30.893	0.179369	1.13239	0.469059	no
AYM39_RS02500	class II fructose-bisphosphate aldolase	fbaA1	597.432	767.034	0.360515	1.28388	0.32066	no
AYM39_RS05110	triose-phosphate isomerase	tpi	454.919	1021.55	1.16708	2.24557	0.00043979	yes
AYM39_RS06710	type I glyceraldehyde-3-phosphate dehydrogenase	gapdh	558.609	943.483	0.756158	1.68899	0.0450852	no
AYM39_RS03825	phosphoglycerate kinase	pgk	341.016	431.858	0.340719	1.26639	0.312684	no
AYM39_RS13515	phosphoglycerate mutase (2,3-diphosphoglycerate-independent)	gpmI	110.266	228.883	1.05362	2.07573	0.00072858	yes
AYM39_RS04455	phosphopyruvate hydratase	eno	305.511	362.13	0.245285	1.18533	0.470503	no
AYM39_RS06715	pyruvate kinase	pk	585.361	995.511	0.76611	1.70068	0.0658157	no
